# Supplementary material for: A flexible transparent colorimetric wrist strap sensor
Source: Royal Society of Chemistry journal article supplement (doi:10.1039/c6nr08265c), 2016-12-05
Supplement: c6nr08265c1.pdf [file c6nr08265c1.pdf]

Electronic Supplementary Material (ESI) for Nanoscale.

This journal is © The Royal Society of Chemistry 2016

### Flexible Transparent Colorimetric Wrist Strap Sensor

Ting Wang,<sup>a,b,c</sup> Yunlong Guo,<sup>a</sup> Pengbo Wan,<sup>\*a</sup> Xiaoming Sun,<sup>a</sup> Han Zhang,<sup>\*b</sup> Zhongzhen Yu,<sup>a</sup> and Xiaodong Chen<sup>c</sup>

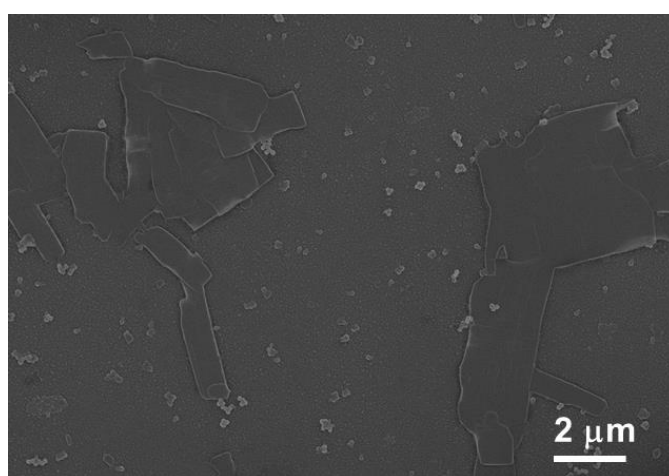

**Fig. S1** SEM image of PDA film on PET.

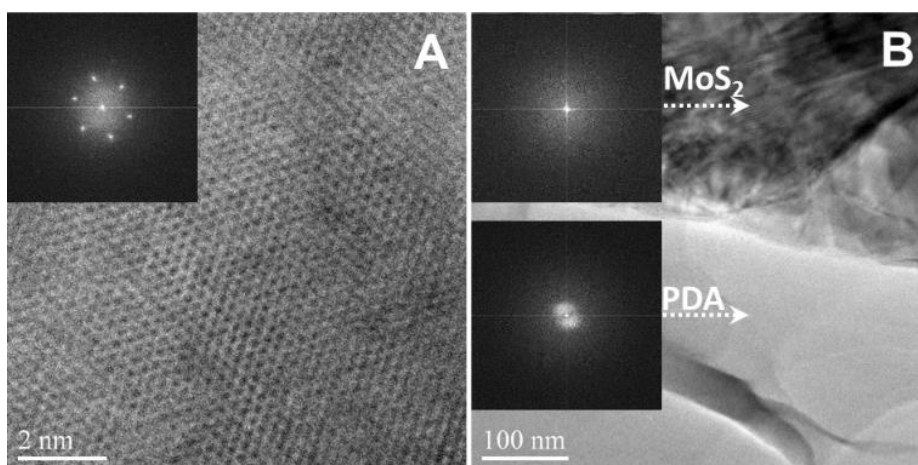

**Fig. S2** The HRTEM and FFT pattern images of MoS<sub>2</sub> nanosheets (A) and PDA/MoS<sub>2</sub> (B).

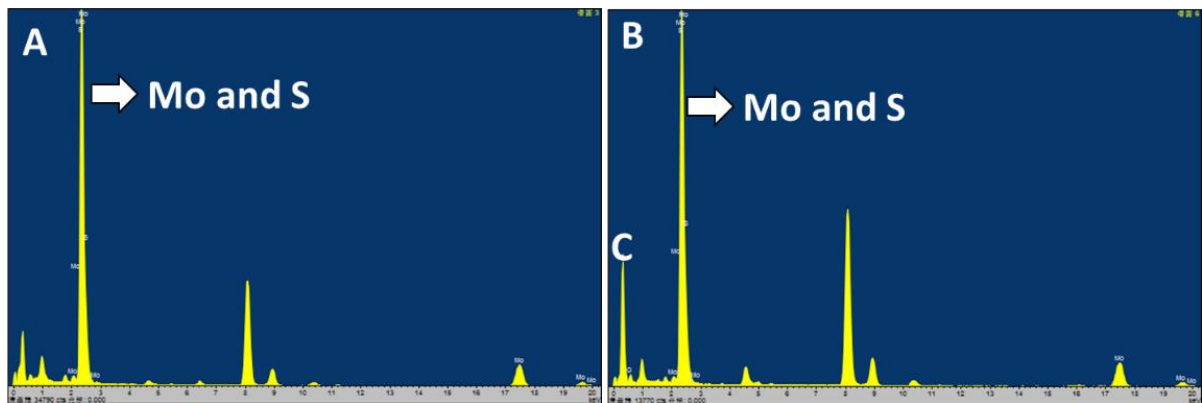

**Fig. S3** EDS spectra of MoS<sub>2</sub> (A) and PDA/MoS<sub>2</sub> (B).

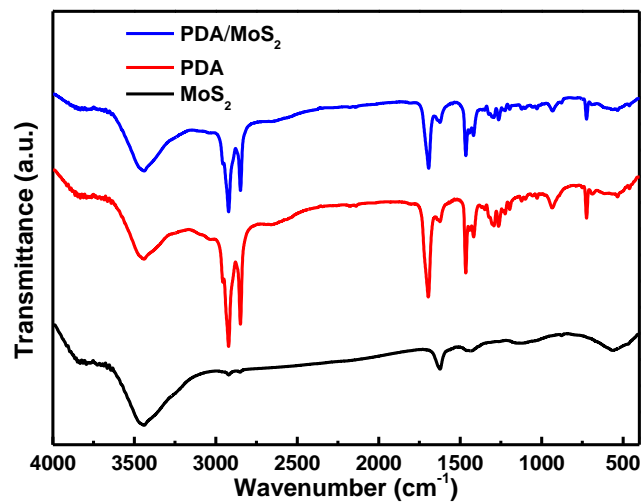

**Fig. S4** FTIR of MoS<sub>2</sub>, PDA, and PDA/MoS<sub>2</sub> composite.

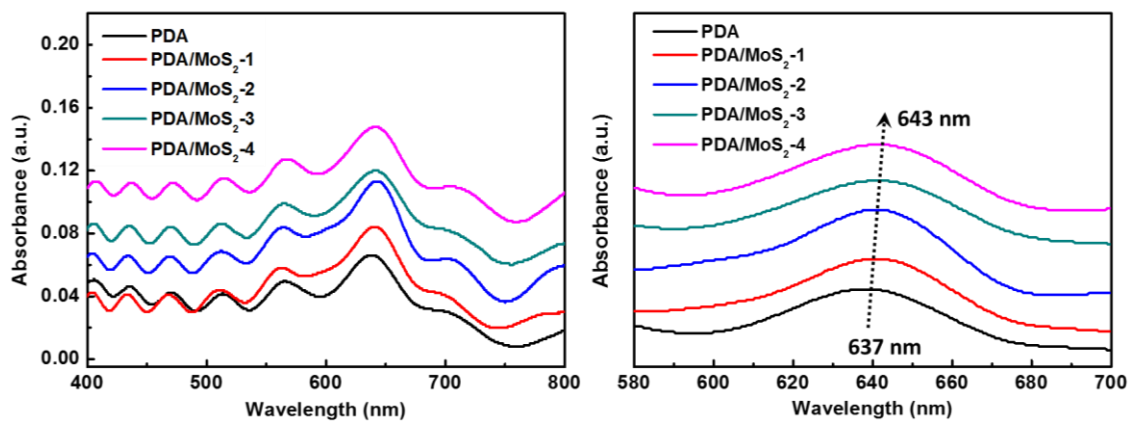

**Fig. S5** UV-vis spectra of PDA, and PDA/MoS<sub>2</sub> films.

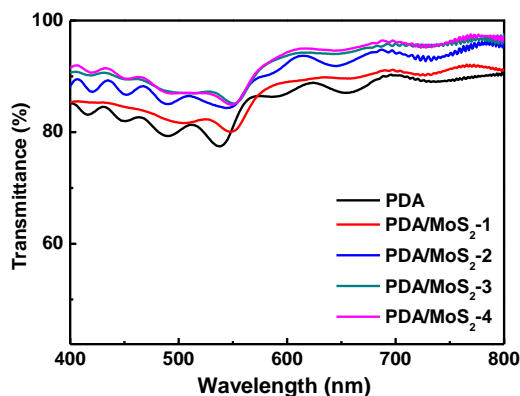

**Fig. S6** Transmittance spectra of PDA, PDA/MoS<sub>2</sub>-1, PDA/MoS<sub>2</sub>-2, PDA/MoS<sub>2</sub>-3, and PDA/MoS<sub>2</sub>-4 films after exposed to DMF vapor.

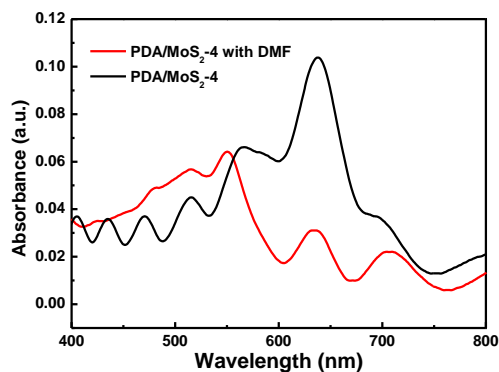

**Fig. S7** UV-vis spectra of PDA/MoS<sub>2</sub>-4 in the absence and presence of DMF vapor.

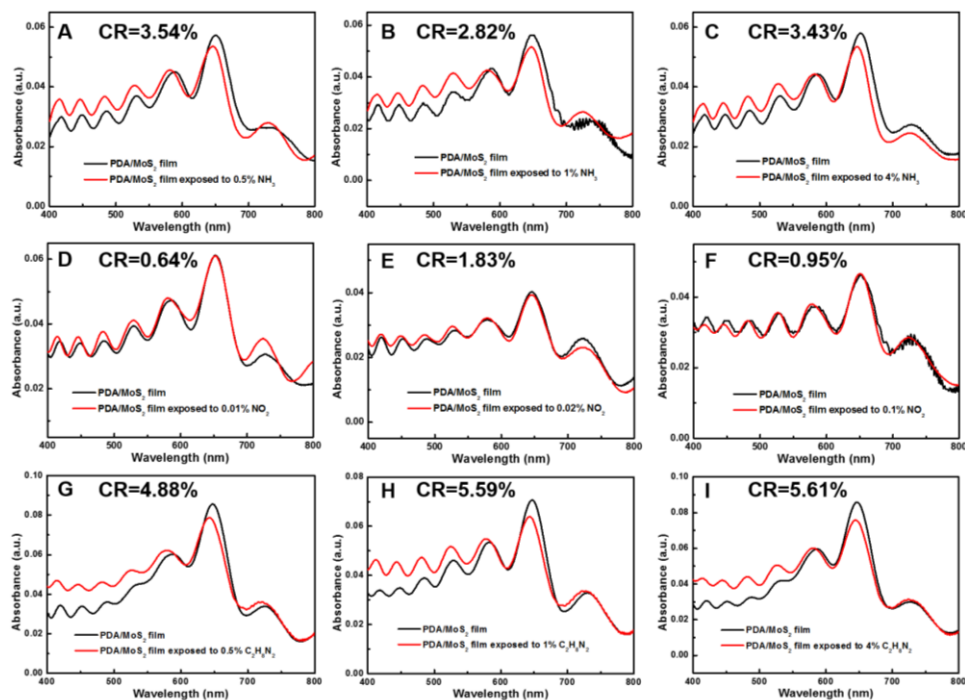

**Fig. S8.** UV-vis spectra of PDA/MoS<sub>2</sub> film exposed to NH<sub>3</sub> (A, B, C), NO<sub>2</sub> (D, E, F), and

$C_2H_8N_2$  (Ethylenediamine) (G, H, I). The concentrations of  $NH_3$  and  $C_2H_8N_2$  were 0.5%, 1%, and 4%. The concentrations of  $NO_2$  were 0.01%, 0.02%, and 0.1%.

We have conducted the detection of N-containing gas species including  $NH_3$ ,  $NO_2$ ,  $C_2H_8N_2$  (Ethylenediamine) using PDA/ $MoS_2$  film sensor. The detecting procedures were the same with that for DMF vapor. It was found that no obvious color changes were observed. The UV-vis spectra of PDA/ $MoS_2$  film before and after exposed to gases were collected. Figure S8 indicated that PDA/ $MoS_2$  film showed *CR* value less than 6% for  $NH_3$ ,  $NO_2$ , and  $C_2H_8N_2$ . As proven by previous research, the colorimetric transition of PDA was generally ascribed to the deformation of PDA side chains by the interaction with suitable organic solvents (Davis, B. W.; Burris, A. J.; Niamnont, N.; Hare, C. D.; Chen, C.-Y.; Sukwattanasinitt, M.; Cheng, Q., *Langmuir* 2014, 30, 9616-9622). For  $NH_3$ ,  $NO_2$  gases, and  $C_2H_8N_2$ , despite of their affinity to  $MoS_2$ , their weak interaction with PDA failed to induce the color change of PDA.
